# Supplementary material for: A Mechanistic Paradigm for Broad-Spectrum Antivirals that Target Virus-Cell Fusion
Source: PubMed Central journal article supplement (PMC3630091; doi:10.1371/journal.ppat.1003297), 2013-04-18

# Time-of-addition assay

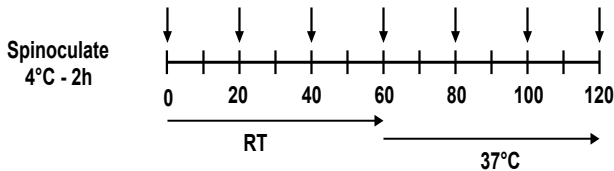

—| sensitivity to anti-CD4 ( $t_{1/2} \sim 49$  min)

—| sensitivity to T-20 ( $t_{1/2} \sim 80$  min)

—| sensitivity to LJ001 ( $t_{1/2} \sim 90$  min)

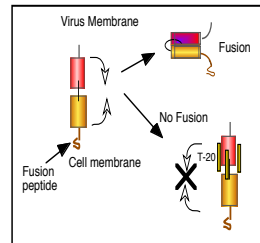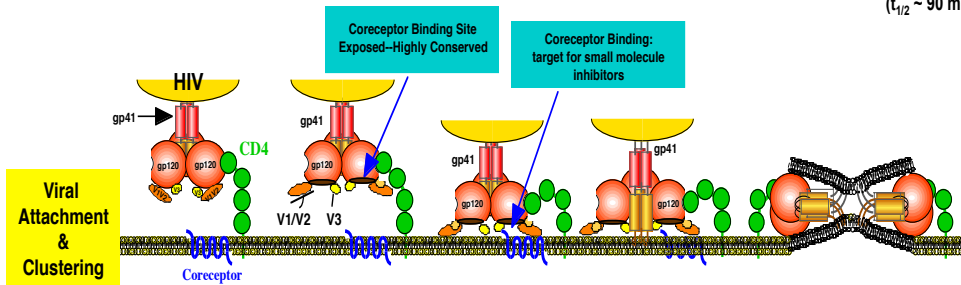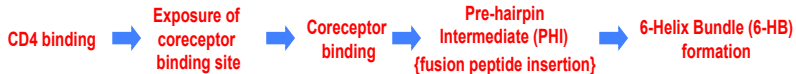

Supplement: ppat.1003297.s001.pdf [file ppat.1003297.s001.pdf]
