# Supplementary material for: A Mechanistic Paradigm for Broad-Spectrum Antivirals that Target Virus-Cell Fusion
Source: PubMed Central journal article supplement (PMC3630091; doi:10.1371/journal.ppat.1003297), 2013-04-18

## LJ025

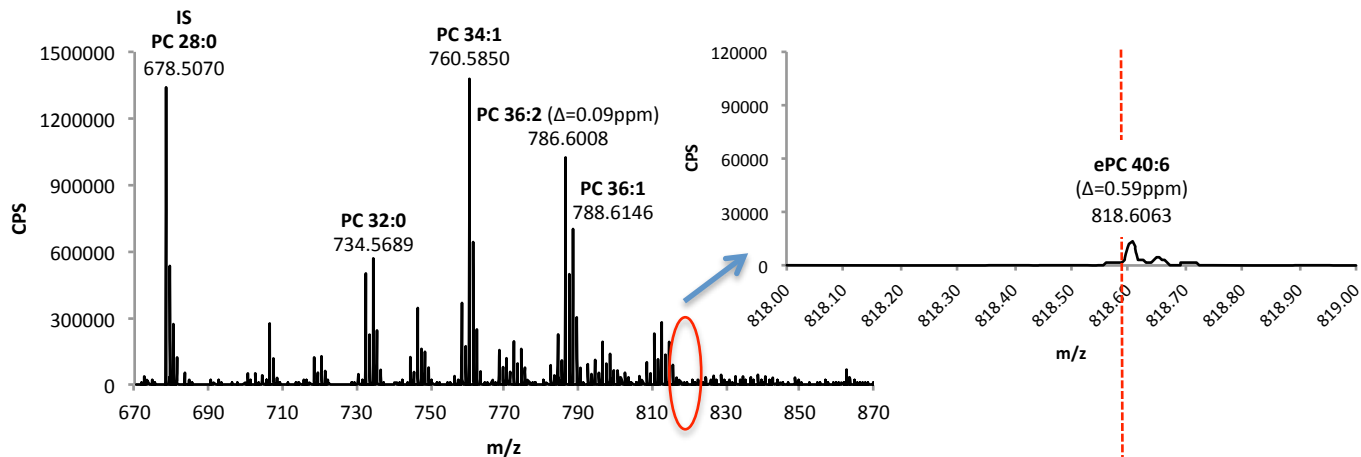

## LJ001

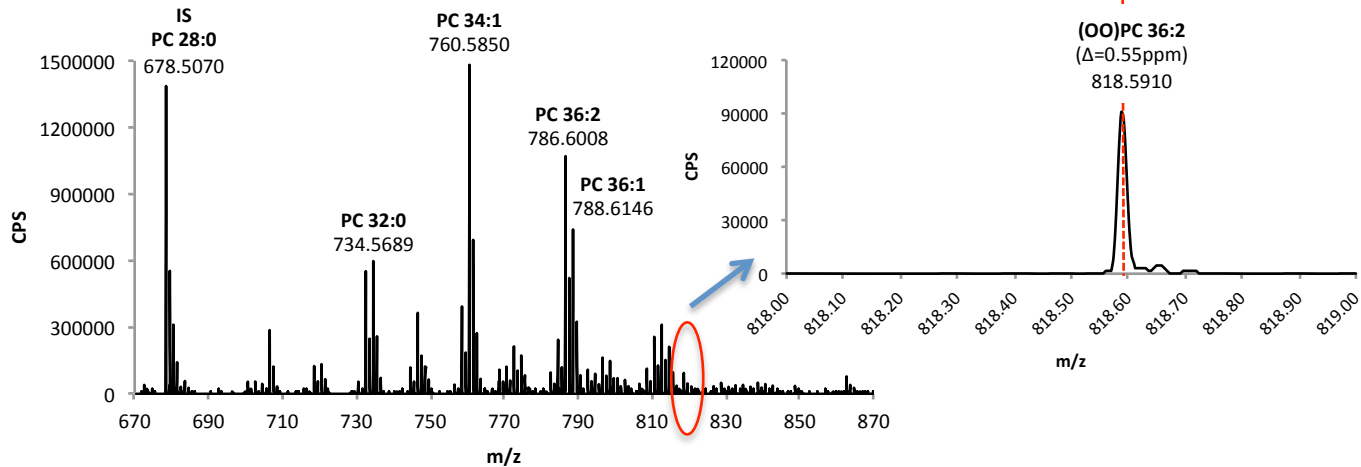

Supplement: ppat.1003297.s003.pdf [file ppat.1003297.s003.pdf]
