# Supplementary material for: A Mechanistic Paradigm for Broad-Spectrum Antivirals that Target Virus-Cell Fusion
Source: PubMed Central journal article supplement (PMC3630091; doi:10.1371/journal.ppat.1003297), 2013-04-18

# Fatty acid

Linoleic acid  
(octadecadienoic acid)

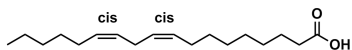

Hydroperoxy-octadecadienoic acids  
(9-, 10-, 12- and 13-HpODE)

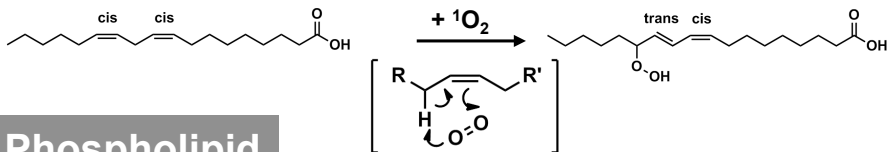

Reduction

Hydroxy octadecadienoic acids  
(9-, 10-, 12- and 13-HODE)

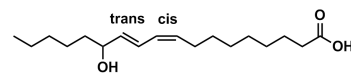

# Phospholipid

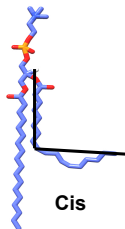

Cis

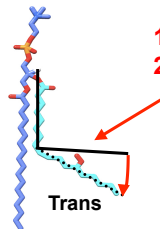

Trans

- 1) Addition of a polar group
- 2) Increase of the angle in the acyl chain formed by the trans C=C double bond

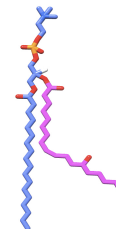

# Membrane

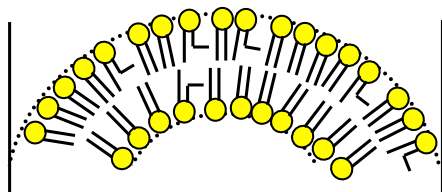

Shrinkage

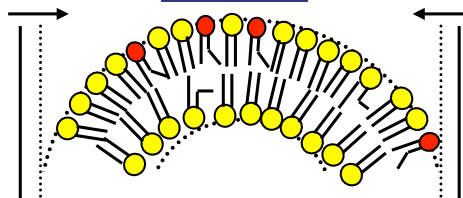

↑ Positive curvature

&

Clustering

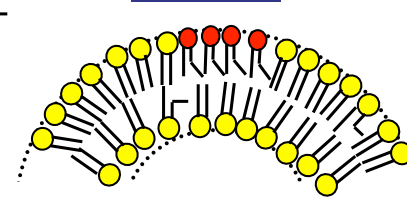

↓ Membrane fluidity

# Virus

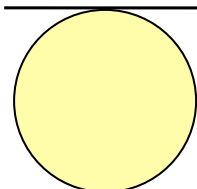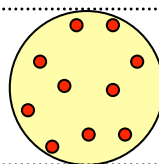

FUSION INHIBITION

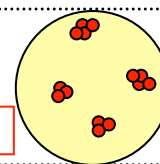

Supplement: ppat.1003297.s007.pdf [file ppat.1003297.s007.pdf]
