# Supplementary material for: A Mechanistic Paradigm for Broad-Spectrum Antivirals that Target Virus-Cell Fusion
Source: PubMed Central journal article supplement (PMC3630091; doi:10.1371/journal.ppat.1003297), 2013-04-18

**LJ001**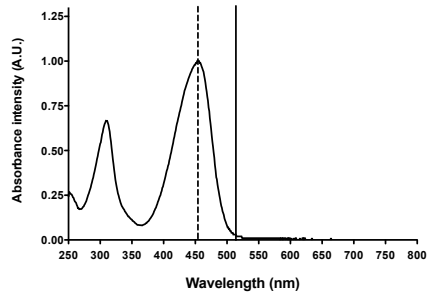**JL102**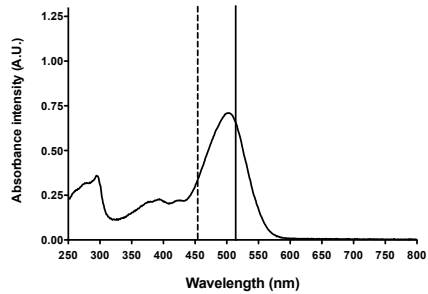**JL118**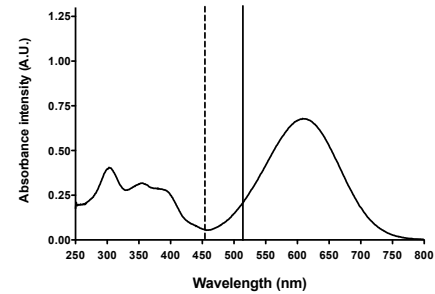**LJ025**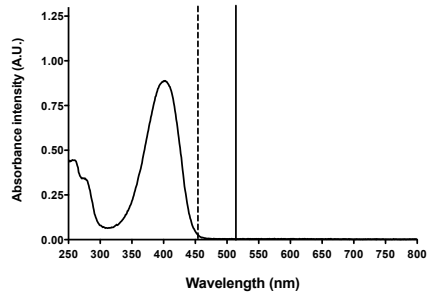**JL103**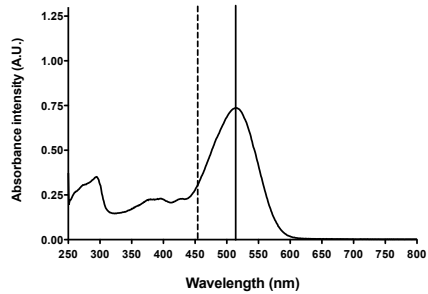**JL122**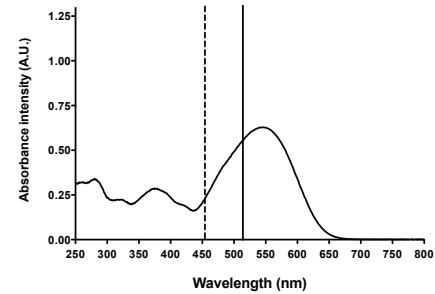**JL101**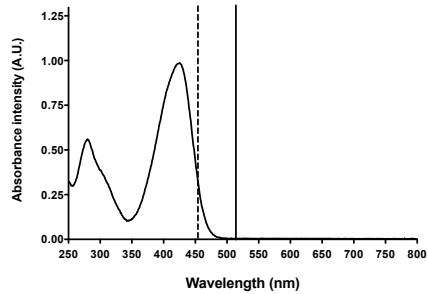**JL108**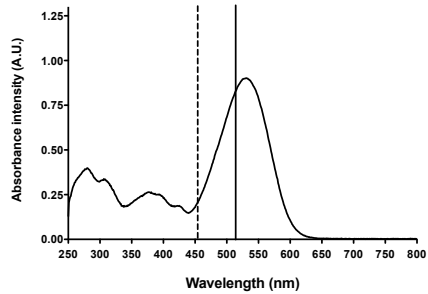**JL123**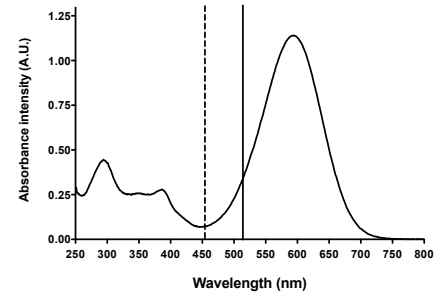**JL109**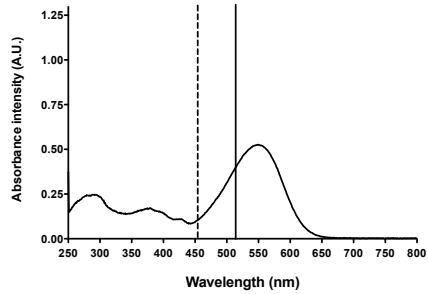**JL121**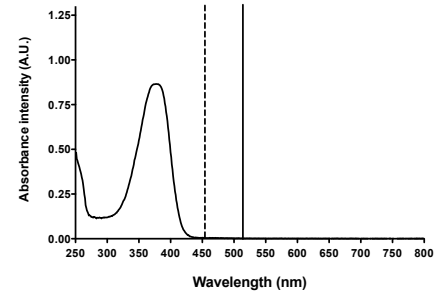

Supplement: ppat.1003297.s011.pdf [file ppat.1003297.s011.pdf]
