# Supplementary material for: A Mechanistic Paradigm for Broad-Spectrum Antivirals that Target Virus-Cell Fusion
Source: PubMed Central journal article supplement (PMC3630091; doi:10.1371/journal.ppat.1003297), 2013-04-18

**A****RVFV challenge**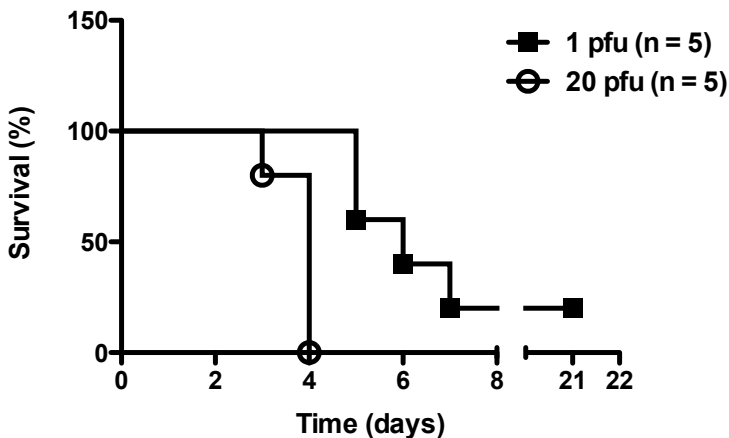**B****JL103 vs VIRUS - 20 pfu**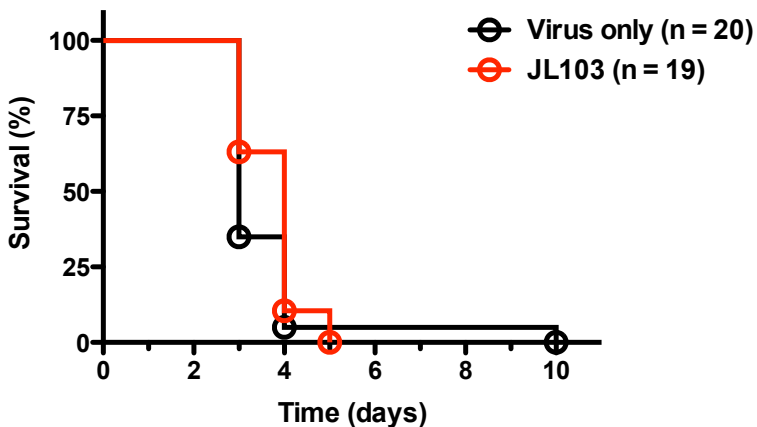

Supplement: ppat.1003297.s012.pdf [file ppat.1003297.s012.pdf]
