# Supplementary material for: A Mechanistic Paradigm for Broad-Spectrum Antivirals that Target Virus-Cell Fusion
Source: PubMed Central journal article supplement (PMC3630091; doi:10.1371/journal.ppat.1003297), 2013-04-18
Supplement: ppat.1003297.s013.pdf [file ppat.1003297.s013.pdf]

**Supplementary Table S1. Parameters obtained from the fitting of the fluorescence data of partition assays of selected 2-(thio)oxothiazolidin-4-ones (LJ001 and LJ025) and oxazolidine dithiones (JL103, JL118 and JL122).**

| Lipid Mixture:   | LJ001             |                 | LJ025             |                 | JL103             |                  | JL118             |               | JL122             |                 |
|------------------|-------------------|-----------------|-------------------|-----------------|-------------------|------------------|-------------------|---------------|-------------------|-----------------|
|                  | $K_p \times 10^3$ | $I_L / I_w$     | $K_p \times 10^3$ | $I_L / I_w$     | $K_p \times 10^3$ | $I_L / I_w$      | $K_p \times 10^3$ | $I_L / I_w$   | $K_p \times 10^3$ | $I_L / I_w$     |
| POPC             | 108<br>± 33.5     | 2.29<br>± 0.045 | 23.8<br>± 3.01    | 2.79<br>± 0.052 | 0.58<br>± 0.059   | 14.78<br>± 0.652 | 2.70<br>± 0.136   | 233<br>± 3.0  | 1.13<br>± 0.131   | 143.8<br>± 5.4  |
| HIV-like mixture | 5.19<br>± 0.81    | 2.41<br>± 0.095 | 12.61<br>± 3.52   | 3.60<br>± 0.198 | 0.31<br>± 0.077   | 68.29<br>± 7.624 | 2.01<br>± 0.310   | 488<br>± 18.5 | 0.267<br>± 0.021  | 613.7<br>± 27.8 |

All measures were made at least in triplicate (see materials and methods), Mean ± SEM is shown. For POPC, a lipid with packing density and fluidity properties similar to mammalian cell membranes,  $K_p$  values of 108,000 and 23,800 were obtained for LJ001 and LJ025, respectively. When HIV-mimicking membranes were tested, LJ025 exhibited apparently higher  $K_p$  values than LJ001.

Results indicate that the  $K_p$  values for the JL compounds (580, 2,700 and 1,130 for JL103, JL118 and JL122, respectively) with POPC are about 1-2 orders of magnitude less than that for LJ001 (108,000) and LJ025 (23,800), but still remain high. The  $K_p$  values vary less for HIV-mimicking membranes. Despite the lower partitioning of JL compounds into membranes (compared to LJ001), JL103, JL118 and JL122 are much more potent antiviral ( $IC_{50} < 10$ -100 fold of LJ001). This indicates that differences in  $IC_{50}$ s cannot be due to differential partitioning, and reinforces our statement that the increased antiviral activity of the JL compounds is due to their increased potency as photosensitizers.
