# Supplementary material for: A Mechanistic Paradigm for Broad-Spectrum Antivirals that Target Virus-Cell Fusion
Source: PLoS Pathog. 2013 Apr 18;9(4):e1003297. doi: 10.1371/journal.ppat.1003297 (PMC3630091; doi:10.1371/journal.ppat.1003297)
Supplement: Table S4 — Pharmacokinetics of selected 2-(thio)oxothiazolidin-4-one (LJ001) and oxazolidine dithiones (JL103, JL118, JL122). (PDF) [file ppat.1003297.s016.pdf]

**Supplementary Table S4 – Pharmacokinetics of selected 2-(thio)oxothiazolidin-4-one (LJ001) and oxazolidine dithiones (JL103, JL118, JL122)**

| Drug   | Dose Route | Dose Level (mg/kg) | C <sub>p</sub> or C <sub>max</sub> <sup>a</sup> (ng/ml) | T <sub>max</sub> (hr) | AUC <sub>last</sub> (hr*ng/ml) | AUC <sub>inf</sub> (hr*ng/ml) | MRT <sub>last</sub> (hr) | t <sub>1/2</sub> (hr) | F (%)           | V <sup>e</sup> (L/kg) | Cl <sup>e</sup> (ml/hr/kg) |
|--------|------------|--------------------|---------------------------------------------------------|-----------------------|--------------------------------|-------------------------------|--------------------------|-----------------------|-----------------|-----------------------|----------------------------|
| LJ-001 | iv         | 10                 | 767.0                                                   | 0.08                  | 238                            | 241                           | 0.2                      | 0.2                   | NA <sup>c</sup> | 9.1                   | 41549                      |
|        | ip         | 5                  | 56.2                                                    | 0.08                  | 15                             | 17                            | 0.2                      | 0.2                   | 14.1            | 9.1                   | 41825                      |
|        | po         | 10                 | 7.9 <sup>b</sup>                                        | 0.5                   | NC                             | NC <sup>d</sup>               | NC                       | NC                    | NC              | NC                    | NC                         |
|        | po         | 100                | 5.4 <sup>b</sup>                                        | 0.08                  | NC                             | NC                            | NC                       | NC                    | NC              | NC                    | NC                         |
| JL-103 | iv         | 10                 | 16167.0                                                 | 0.08                  | 6464                           | 6498                          | 1.1                      | 2.2                   | NA              | 4.8                   | 1539                       |
|        | ip         | 10                 | 612.7                                                   | 0.5                   | 2894                           | 2959                          | 4.2                      | 4.1                   | 45.5            | 9.1                   | 1538                       |
|        | po         | 10                 | 1126.7                                                  | 1                     | 3093                           | 3115                          | 2.3                      | 1.6                   | 47.9            | 3.6                   | 1538                       |
|        | po         | 100                | 417.0                                                   | 1                     | 1947                           | 1986                          | 3.6                      | 2.2                   | 3.1             | 4.9                   | 1561                       |

<sup>a</sup> C<sub>p</sub> is the first measured plasma concentration for iv groups.

<sup>b</sup> There was only one sample with detectable drug levels.

<sup>c</sup> NA = not applicable.

<sup>d</sup> NC = not calculated. There were insufficient data points for calculation of parameter.

<sup>e</sup> For ip and po groups, V and Cl were calculated from F\*(V/F) and F\*(Cl/F), respectively.

| Test Compound | Dose Route | Dose (mg/kg) | C <sub>max</sub> (ng/ml) | T <sub>max</sub> (hr) | AUC <sub>last</sub> (hr*ng/ml) | AUC <sub>inf</sub> (hr*ng/ml) | MRT <sub>last</sub> (hr) | t <sub>1/2</sub> (hr) | V/F (L/kg)      | Cl/F (ml/hr/kg) |
|---------------|------------|--------------|--------------------------|-----------------------|--------------------------------|-------------------------------|--------------------------|-----------------------|-----------------|-----------------|
| JL-118        | ip         | 1.25         | 626                      | 0.5                   | 1835                           | 2247.92                       | 5.3                      | 16.0                  | 12.8            | 556.1           |
| JL-118        | po         | 10           | 253                      | 1                     | 1347.67                        | NC <sup>a</sup>               | 8.8                      | NC <sup>a</sup>       | NC <sup>a</sup> | NC <sup>a</sup> |
|               | po         | 50           | 122                      | 0.5                   | 841.24                         | NC <sup>a</sup>               | 9.8                      | NC <sup>a</sup>       | NC <sup>a</sup> | NC <sup>a</sup> |
|               | po         | 100          | 124                      | 0.5                   | 1159.83                        | NC <sup>a</sup>               | 11.4                     | NC <sup>a</sup>       | NC <sup>a</sup> | NC <sup>a</sup> |
| JL-122        | ip         | 5            | 122                      | 0.5                   | 568.61                         | NC <sup>a</sup>               | 5.5                      | NC <sup>a</sup>       | NC <sup>a</sup> | NC <sup>a</sup> |
|               | ip         | 10           | 132                      | 0.25                  | 924.18                         | NC <sup>a</sup>               | 6.2                      | NC <sup>a</sup>       | NC <sup>a</sup> | NC <sup>a</sup> |
| JL-122        | po         | 10           | 99.3                     | 0.5                   | 231.79                         | NC <sup>a</sup>               | 4.7                      | NC <sup>a</sup>       | NC <sup>a</sup> | NC <sup>a</sup> |
|               | po         | 100          | 287                      | 1                     | 1271.74                        | NC <sup>a</sup>               | 7.0                      | NC <sup>a</sup>       | NC <sup>a</sup> | NC <sup>a</sup> |

<sup>a</sup> NC - Not calculated, due to limited ( $\leq 2$ ) number of time-points with measurable plasma concentrations in the terminal elimination phase after T<sub>max</sub> or a poor fit ( $r^2 \leq 0.8$ ) for the straight line portion in the terminal elimination phase

iv: intravenous. ip: intraperitoneal. po: per os (oral). C<sub>p</sub>: plasma concentration. C<sub>max</sub>: observed maximum plasma concentration after administration. T<sub>max</sub>: time to reach C<sub>max</sub>. AUC<sub>last</sub>: area under the concentration-time curve up to the last measurable concentration. AUC<sub>inf</sub>: AUC curve to infinite time. MRT<sub>last</sub>: mean residence time of the drug in the systemic circulation from 0 to last time point. t<sub>1/2</sub>: terminal half-life. F: absolute bioavailability. V: volume of distribution. Cl: total plasma serum or blood clearance of drug.
